# Supplementary material for: The heart endocardium is derived from vascular endothelial progenitors
Source: Oxford University Press journal article supplement (doi:10.1242/dev.061192), 2011-10-11
Supplement: dev061192tables1.pdf [file dev061192tables1.pdf]

**Table S1. Primers for in situ hybridization probes**

| Gene          | 5' primer            | 3' primer            |
|---------------|----------------------|----------------------|
| <i>NKX2.5</i> | TGAAGAGCTACGGGGAGATG | AGTTAGGGTACGCGGGGTAG |
| <i>ISL1</i>   | TTCAAAACAAGCGATGCAAG | TCCGGTAGAATTGGAACC   |
| <i>GATA4</i>  | CTCCTACTCCAGCCCTTACC | GCCCTGTGCCATCTCTCTC  |
| <i>VEGFR2</i> | CAAGTATGGCTCAACGCAGA | CCCTCAAAGGGTGTCTGTA  |
| <i>TAL1</i>   | ACTCGCGGTGTCCTACTTA  | GCCGTACATGGAGAAGGAGT |
| <i>LMO2</i>   | CGAGAGGAAGAGCCTCGAT  | GTCCGAGTTGATCAGGAGGT |
| <i>Pecam1</i> | CGGTGTTTCAGCGAGATCC  | CGACAGGATGGAAATCACAA |

All are chick genes, except for *Pecam1* (mouse).
